# Supplementary material
Source: Springer Nature journal article supplement (https://www.springermedizin.de/resource/supplementary/13075_2009_2775_MOESM6_ESM.pdf/9692858)

**A**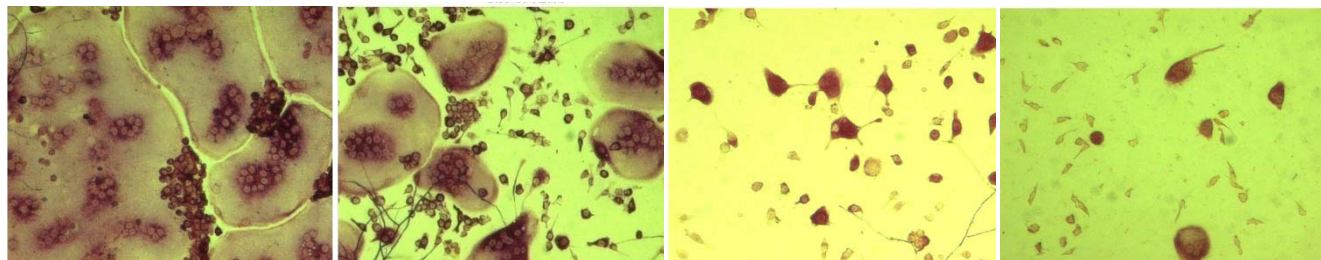

M-CSF + RANKL

M-CSF + RANKL  
+ 0.2  $\mu$ M imatinibM-CSF + RANKL  
+ 1  $\mu$ M imatinibM-CSF + RANKL  
+ 0.2  $\mu$ M GW2580**B**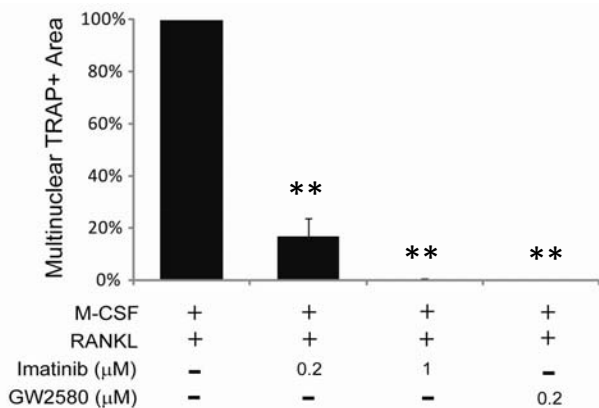**C**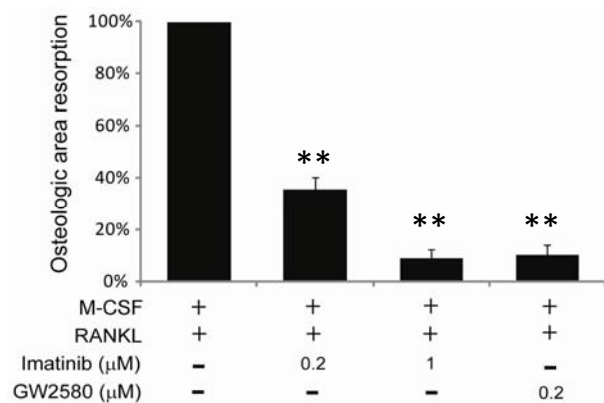

Supplement: MOESM6 [file 9692858]
